# Supplementary material for: An N-linked disalicylaldehyde together with its caesium ion and dichloromethane sensing performances: ‘dual key & lock’ LMCT-enhanced fluorescence strategy
Source: Royal Society of Chemistry journal article supplement (doi:10.1039/d0an00475h), 2020-01-01
Supplement: d0an00475h1.pdf [file d0an00475h1.pdf]

## Electronic Supplementary Information

### An N-linked disalicylaldehyde together with its caesium ion and dichloromethane sensing performances: 'Dual key & lock' LMCT-enhanced fluorescence strategy

Kun Zhang,\* Ting-Ting Chen, Yin-Jing Shen, Zhuo-Ran Yang, Yan Huang, Shishen Zhang, Jiadan Xue and Benxia Li

Department of Chemistry, Zhejiang Sci-Tech University, Xiasha Higher Education District, Hangzhou 310018, P. R. China

#### Tables

**Table S1** Crystal data and structural refinements for complexes H<sub>2</sub>Q<sub>j</sub>.

| Compound                                                                                 | H <sub>2</sub> Q <sub>j</sub>                                   |
|------------------------------------------------------------------------------------------|-----------------------------------------------------------------|
| Empirical formula                                                                        | C <sub>23</sub> H <sub>19</sub> Cl <sub>2</sub> NO <sub>4</sub> |
| Formula weight                                                                           | 444.29                                                          |
| Temperature / K                                                                          | 293(2)                                                          |
| Wavelength / Å                                                                           | 0.71073                                                         |
| Crystal Size (mm)                                                                        | 0.27×0.32×0.36                                                  |
| Crystal system                                                                           | Triclinic                                                       |
| Space group                                                                              | <i>P</i> $\bar{1}$                                              |
| <i>a</i> / Å                                                                             | 9.355(1)                                                        |
| <i>b</i> / Å                                                                             | 10.350(1)                                                       |
| <i>c</i> / Å                                                                             | 12.187(1)                                                       |
| $\alpha$ / °                                                                             | 65.857(2)                                                       |
| $\beta$ / °                                                                              | 87.964(3)                                                       |
| $\gamma$ / °                                                                             | 84.847(3)                                                       |
| <i>V</i> / Å <sup>3</sup>                                                                | 1072.4(2)                                                       |
| <i>Z</i> / <i>D</i> <sub>calcd</sub> (g / cm <sup>3</sup> )                              | 2 / 1.376                                                       |
| <i>F</i> (000)                                                                           | 460                                                             |
| $\mu$ / mm <sup>-1</sup>                                                                 | 0.332                                                           |
| <i>h</i> <sub>min</sub> / <i>h</i> <sub>max</sub>                                        | -12 / 12                                                        |
| <i>k</i> <sub>min</sub> / <i>k</i> <sub>max</sub>                                        | -13 / 13                                                        |
| <i>l</i> <sub>min</sub> / <i>l</i> <sub>max</sub>                                        | -15 / 15                                                        |
| Data / parameters                                                                        | 4945 / 273                                                      |
| <i>R</i> <sub>1</sub> , <i>wR</i> <sub>2</sub> [ <i>I</i> > 2σ( <i>I</i> )] <sup>a</sup> | <i>R</i> <sub>1</sub> = 0.0795, <i>wR</i> <sub>2</sub> = 0.2243 |
| <i>R</i> <sub>1</sub> , <i>wR</i> <sub>2</sub> (all data) <sup>a</sup>                   | <i>R</i> <sub>1</sub> = 0.1411, <i>wR</i> <sub>2</sub> = 0.2638 |
| <i>S</i>                                                                                 | 1.03                                                            |
| Max/min Δρ/e Å <sup>-3</sup>                                                             | 0.81 / -0.55                                                    |

<sup>a</sup>  $R_1 = \sum ||F_o| - |F_c|| / \sum |F_o|$ ,  $wR_2 = [\sum [w(F_o^2 - F_c^2)^2] / \sum w(F_o^2)^2]^{1/2}$

**Table S2** Selected bond distances (Å) and angles (°) in complexes H<sub>2</sub>Q<sub>j</sub>.

| Bond distances                |          | Bond angles |          |
|-------------------------------|----------|-------------|----------|
| H <sub>2</sub> Q <sub>j</sub> |          |             |          |
| C11–C4                        | 1.743(5) | C8–N1–C17   | 111.3(3) |
| C12–C12                       | 1.758(5) | C9–N1–C17   | 109.8(3) |
| O1–C1                         | 1.192(6) | C8–N1–C9    | 109.2(3) |
| O2–C7                         | 1.341(6) | O1–C1–C2    | 125.1(6) |
| O3–C15                        | 1.301(5) | C11–C4–C5   | 118.9(3) |
| O4–C16                        | 1.126(6) | C11–C4–C3   | 120.4(3) |
| N1–C8                         | 1.471(5) | O2–C7–C6    | 120.5(3) |
| N1–C9                         | 1.478(4) | O2–C7–C2    | 119.7(3) |
| N1–C17                        | 1.473(5) | N1–C8–C6    | 111.5(3) |
|                               |          | N1–C9–C10   | 113.0(3) |
|                               |          | C12–C12–C13 | 120.6(4) |
|                               |          | C12–C12–C11 | 119.5(4) |
|                               |          | O3–C15–C14  | 121.2(4) |
|                               |          | O3–C15–C10  | 118.5(4) |
|                               |          | O4–C16–C14  | 125.8(5) |
|                               |          | N1–C17–C18  | 113.2(3) |

Symmetry codes: <sup>a</sup>, 2–x, –y, 1–z; <sup>b</sup>, 1–x, 1–y, –z; <sup>c</sup>, x, –y, z.

**Table S3** Hydrogen bonding parameters (Å, °) in macrocyclic complexes H<sub>2</sub>Q<sub>j</sub>.

| D–H···A                       | D–H  | H···A | D···A    | ∠DHA | Symmetry code |
|-------------------------------|------|-------|----------|------|---------------|
| H <sub>2</sub> Q <sub>j</sub> |      |       |          |      |               |
| O2–H2···N1                    | 0.82 | 1.92  | 2.648(4) | 148  |               |
| O3–H3···O4                    | 0.82 | 1.91  | 2.626(5) | 145  |               |

## Figures

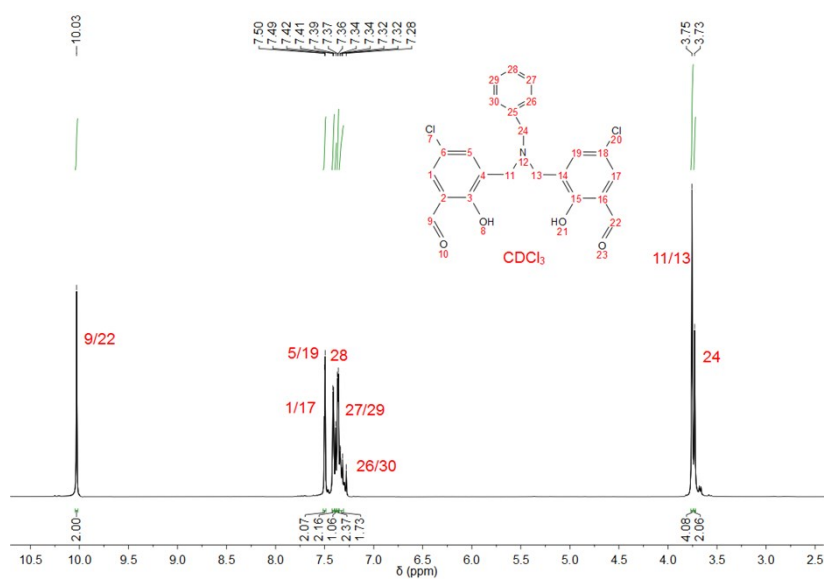

**Fig. S1**  $^1H$  NMR spectrum of dialdehyde  $H_2Q_j$  in  $CDCl_3$ .

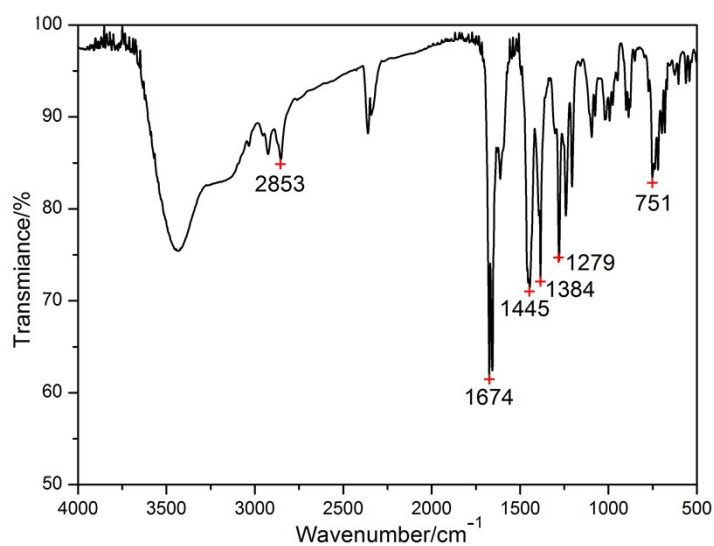

**Fig. S2** FT-IR spectrum of the dialdehyde compound  $H_2Q_j$ .

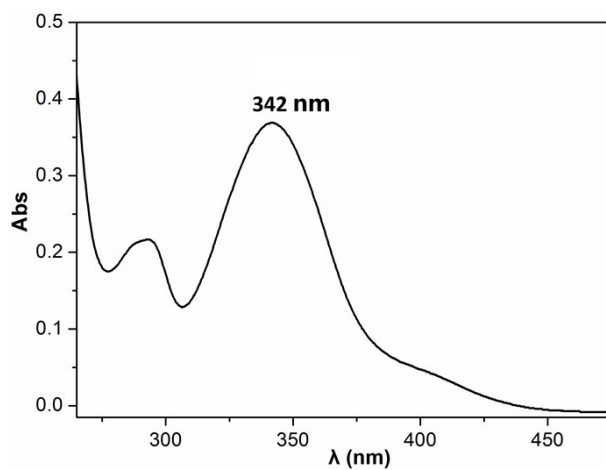

**Fig. S3** Absorption spectra of dialdehyde  $H_2Q_j$  ( $[M] = 50 \mu M$ ) in  $CH_3OH$  at room temperature.

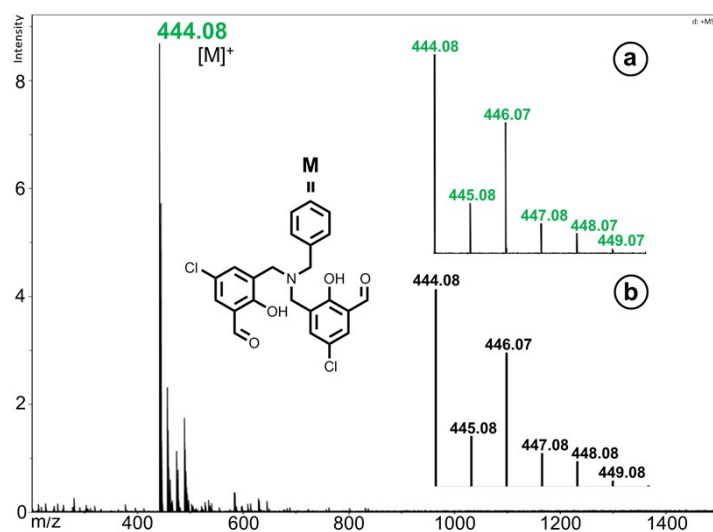

**Fig. S4** ESI-MS (positive) of  $H_2Q_j$  in  $CH_3OH$  together with inserted experimental (a) and simulative (b, calculation for  $[C_{23}H_{19}Cl_2NO_4]$ ) peaks of isotopic distribution corresponding to the peak at  $m/z = 444.08$ .

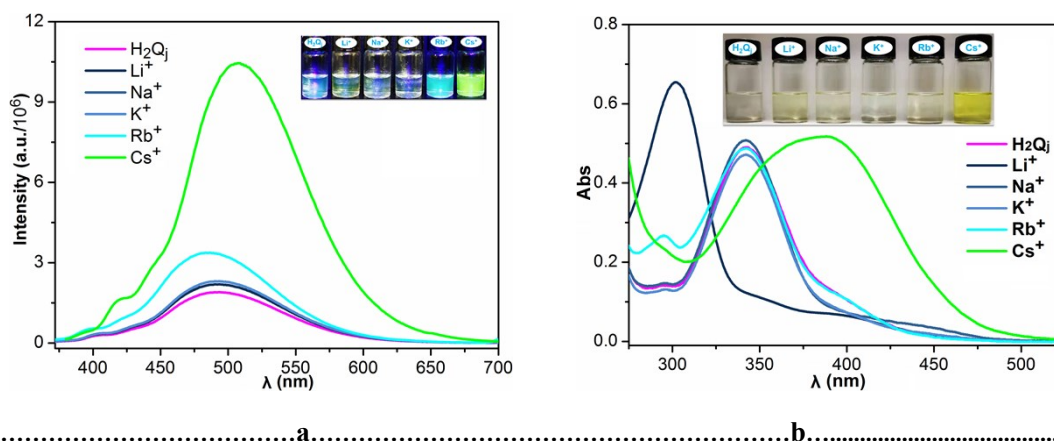

**Fig. S5** The fluorescence (a) and absorption (b) spectra of compound  $H_2Q_j$  ( $[M] = 50 \mu M$ ) with excessive alkali metal ions ( $[M] = 5 \text{ mM}$ ) in  $CH_3OH$  at room temperature.

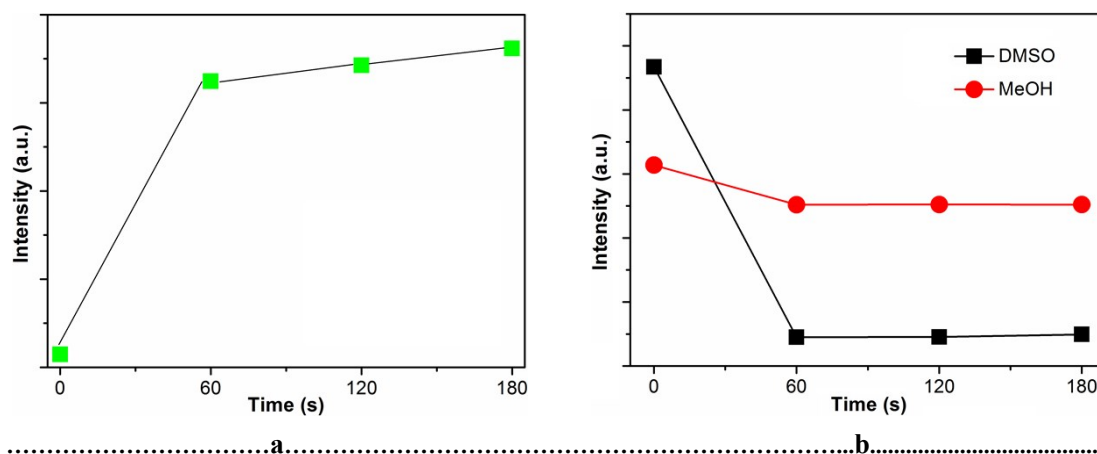

**Fig. S6** Time-dependent fluorescences ( $\lambda_{em} = 507 \text{ nm}$ ) of  $H_2Q_j$  with  $Cs^+$  (a) and  $CH_2Cl_2$  (b).

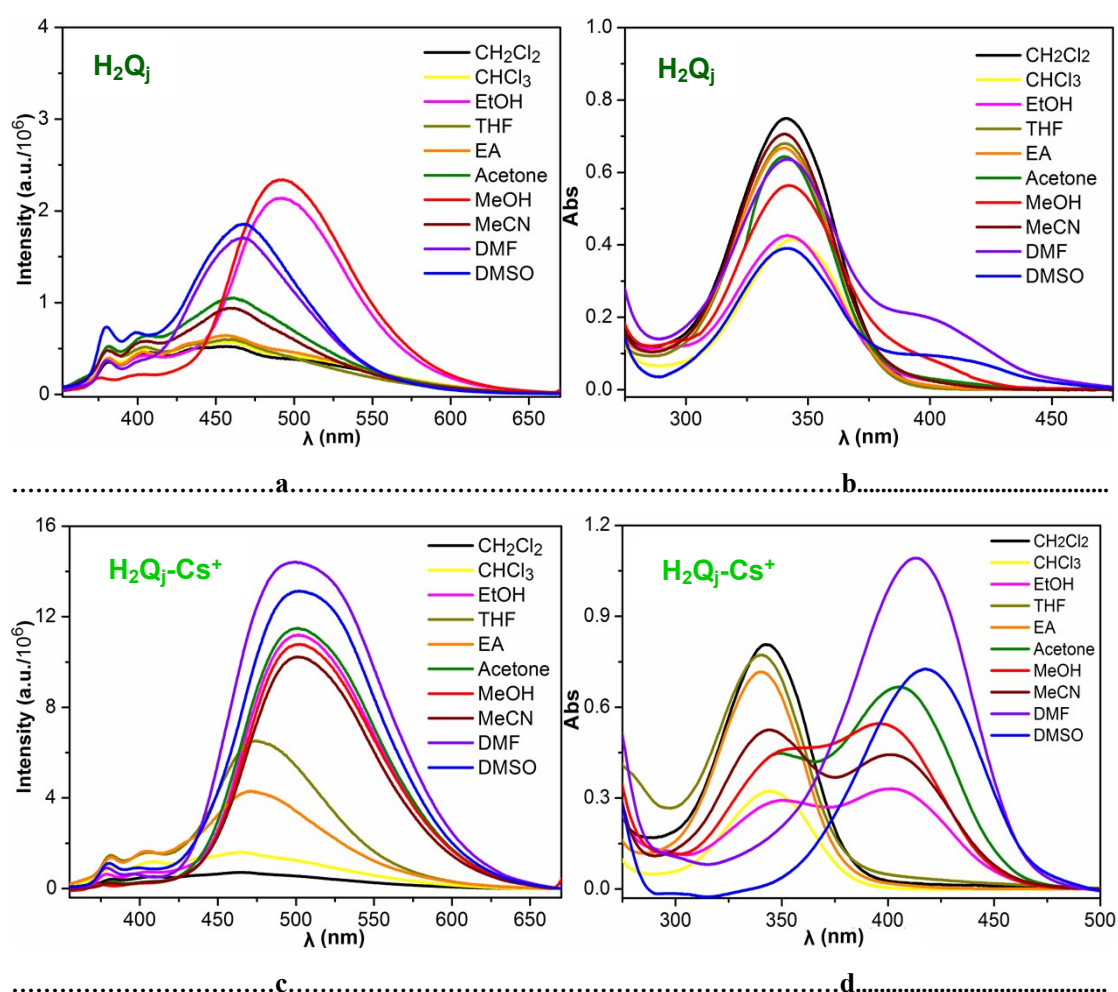

**Fig. S7** Fluorescence (a and c) and absorption (b and d) spectra for  $H_2Q_j$  ( $[M] = 50 \mu M$ ) and its  $Cs^+$  mixture ( $H_2Q_j-Cs^+$ ,  $[H_2Q_j] = 50 \mu M$  and  $[Cs^+] = 5 mM$ ), respectively, in various solvents with 5% (v/v)  $CH_3OH$  at the room temperature.

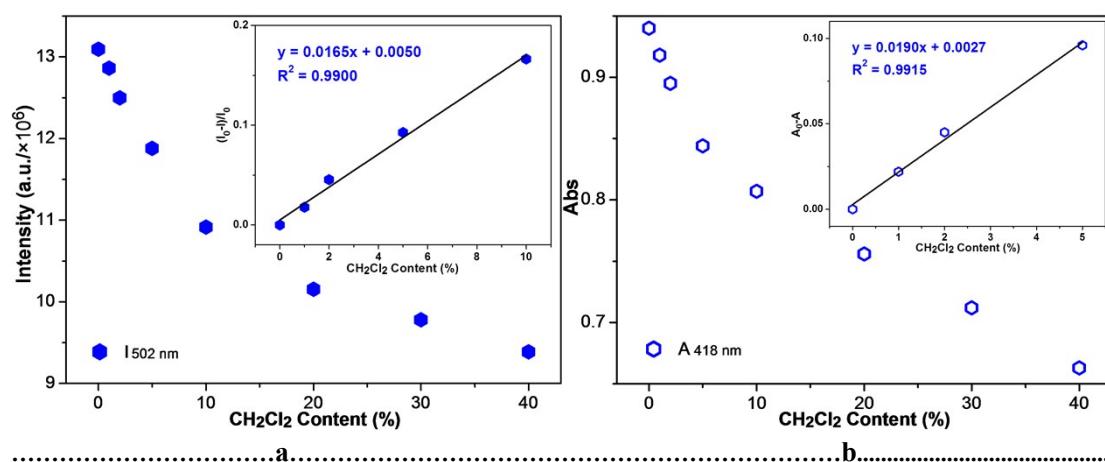

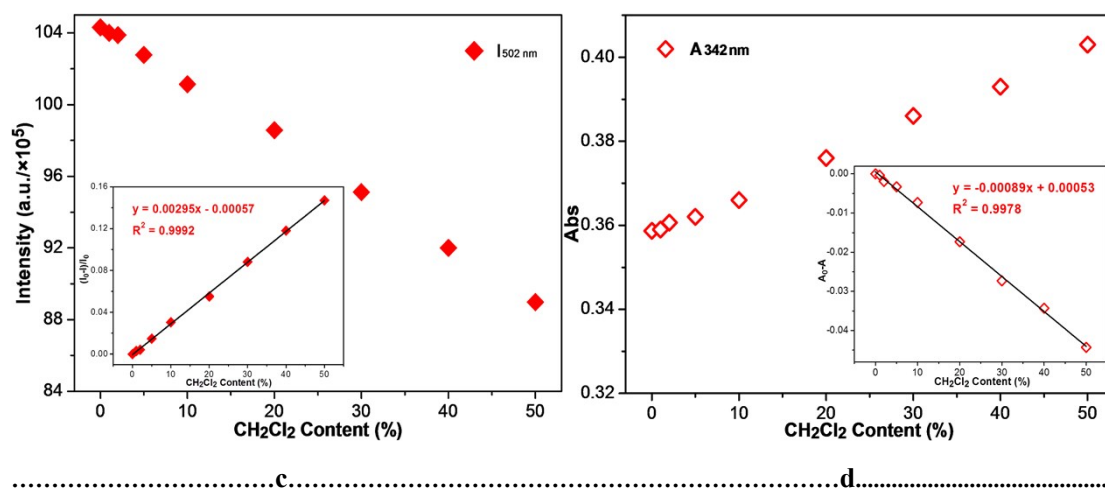

**Fig. S8** Changes of emission intensity ( $\lambda_{em} = 502$  nm) in DMSO (a) and CH<sub>3</sub>OH (c) with inserted linear calibration curve between the  $(I_0 - I)/I_0$  and CH<sub>2</sub>Cl<sub>2</sub> content. Absorption variations and the plot of  $(A_0 - A)$  vs CH<sub>2</sub>Cl<sub>2</sub> content at 418 nm (b) in DMSO and 342 nm (d) in CH<sub>3</sub>OH.

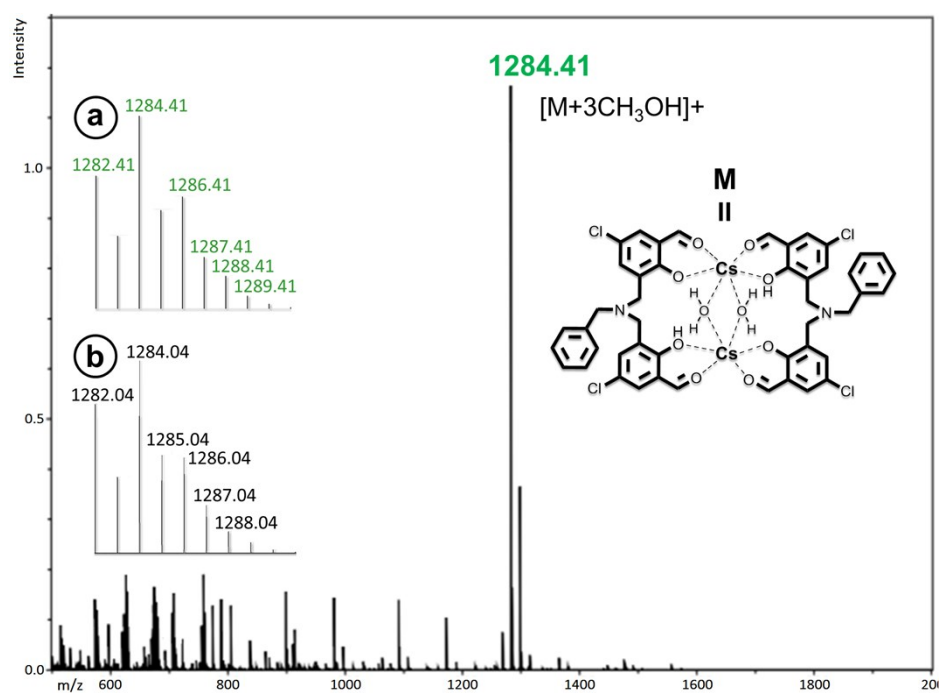

**Fig. S9** The ESI-MS (positive) of H<sub>2</sub>Q<sub>j</sub> with excessive Cs<sup>+</sup> in CH<sub>3</sub>OH together with the inserted experimental (a) and simulative (b, calculation for [C<sub>49</sub>H<sub>51</sub>Cl<sub>4</sub>N<sub>2</sub>O<sub>13</sub>Cs<sub>2</sub>]) peaks of isotopic distribution corresponding to the peak at  $m/z = 1284.41$ .

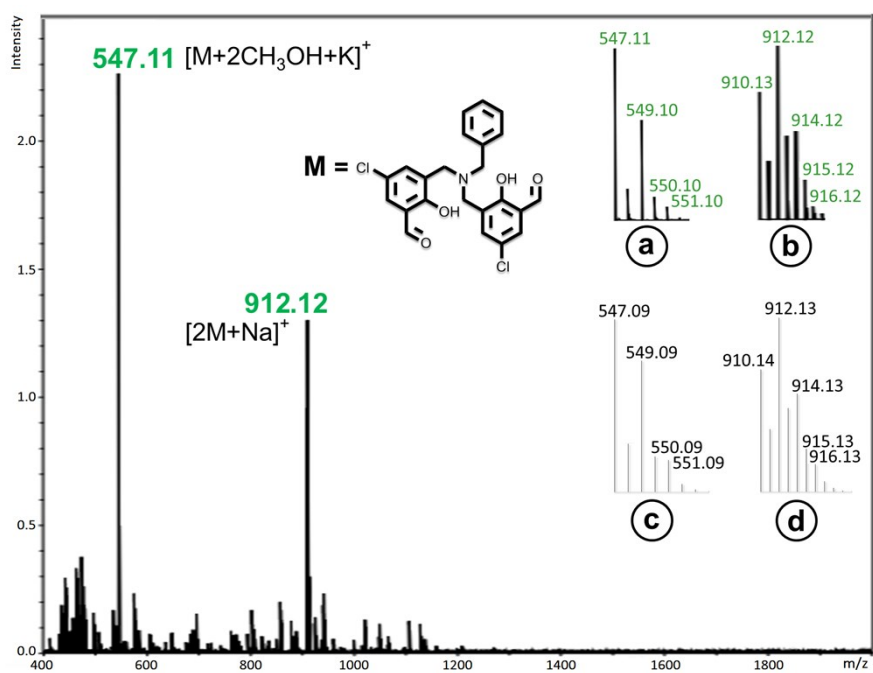

**Fig. S10** The ESI-MS (positive) of  $H_2Q_j$  with excessive  $Cs^+$  in  $CH_3OH-CH_2Cl_2$  ( $v/v = 1:1$ ) together with the inserted experimental (a and b) and simulative (c and d, calculation for  $[C_{25}H_{27}Cl_2NO_6K]$  and  $[C_{46}H_{38}Cl_4N_2O_8Na]$ , respectively) peaks of isotopic distribution corresponding to the peaks at  $m/z = 547.11$  and  $912.12$ .

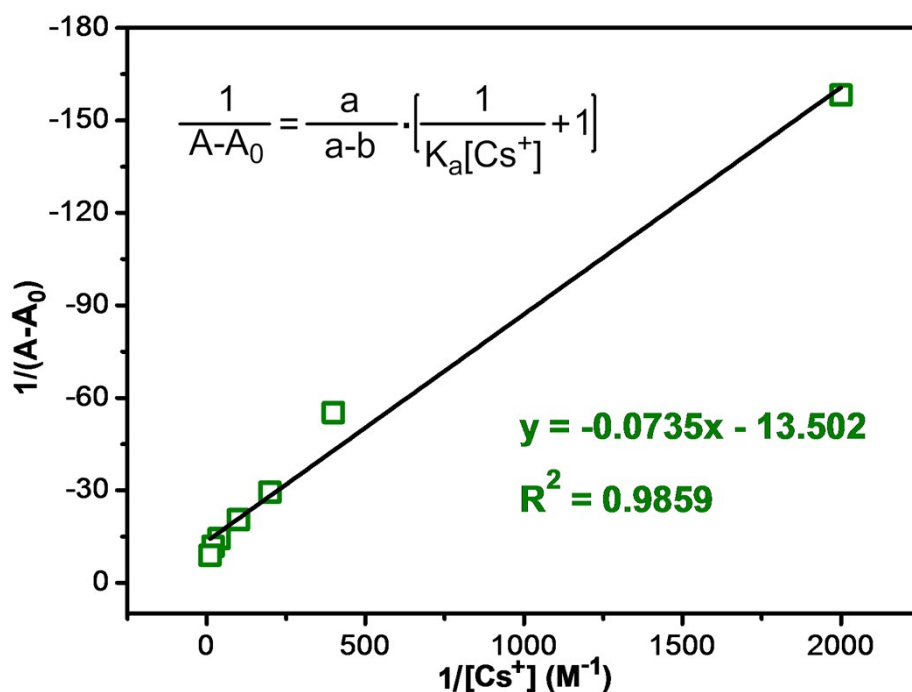

**Fig. S11** Benesi-Hildebrand analysis of sensor  $H_2Q_j$  at different  $Cs^+$  concentrations (0.50–100.0 M).

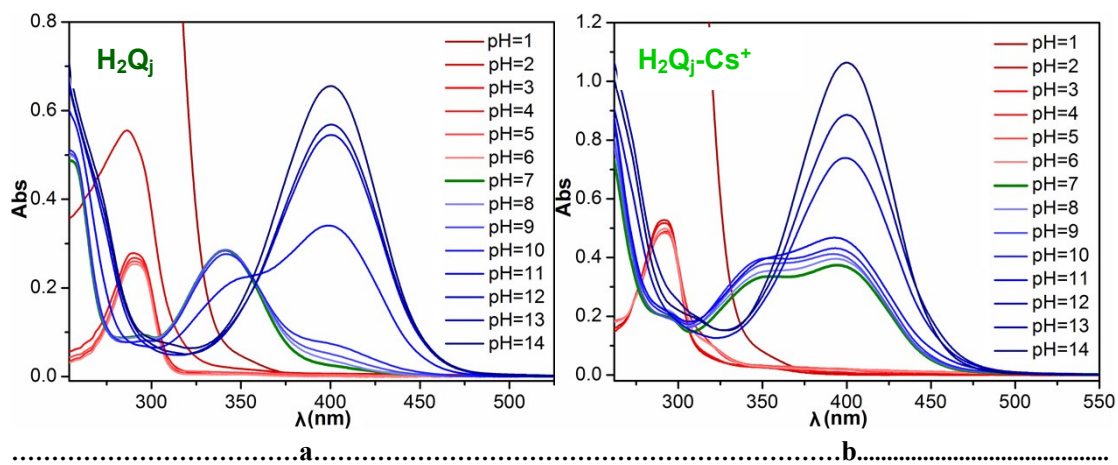

**Fig. S12** The absorption spectra of  $H_2Q_j$  (a) ( $[M] = 100 \mu M$ ) and  $H_2Q_j-Cs^+$  mixture (b) ( $[H_2Q_j] = 100 \mu M$  and  $[Cs^+] = 100 mM$ ) under different pH values (pH = 1–14) in  $CH_3OH$  at room temperature.
